1     **Are bivalves susceptible to domestication selection? Using starvation tolerance to test for**  
2                                   **potential trait changes in eastern oyster larvae**

3  
4     Katherine McFarland<sup>1,2\*</sup>, Louis V. Plough<sup>2</sup>, Michelle Nguyen<sup>2,3</sup>, Matthew P. Hare<sup>1</sup>

5     <sup>1</sup>Department of Natural Resources, Cornell University, Ithaca, New York 14853

6     <sup>2</sup>Center for Environmental Science University of Maryland, Cambridge, Maryland 21613

7     <sup>3</sup>College of Earth, Ocean, and Atmospheric Sciences, Oregon State University, Corvallis, Oregon  
8     97331

9  
10    \*corresponding author

11    Email: [mcfarland.316@gmail.com](mailto:mcfarland.316@gmail.com)

12  
13    **Short Title:** Starvation tolerance in bivalve larvae as a first test for domestication selection

14  
15    **Keywords:** *Crassostrea virginica*, growth rate, respiration, domestication, selective breeding,  
16    oyster, physiology

17  
18

## 19 **Abstract**

20 Conservation efforts are increasingly being challenged by a rapidly changing environment,  
21 and for some aquatic species the use of captive rearing or selective breeding is an attractive option.  
22 However, captivity itself can impose unintended artificial selection known as domestication  
23 selection (adaptation to culture conditions). For most marine species, it is not known to what  
24 degree domestication selection affects traits related to fitness in the wild. To test for domestication  
25 selection in a marine bivalve, we focused on a fitness-related trait (larval starvation resistance) that  
26 could be altered under artificial selection. Using larvae produced from a wild population of  
27 *Crassostrea virginica* and a selectively bred, disease-resistant line we measured growth and  
28 survival during starvation versus standard algal diet (control) conditions. Larvae from both  
29 lineages showed a remarkable resilience to food limitation, possibly mediated by an ability to  
30 uptake and utilize dissolved organic matter for somatic maintenance. Water chemistry analysis  
31 showed dissolved organic carbon in filtered tank water to be at concentrations similar to natural  
32 river water. We observed that survival in larvae produced from the aquaculture line was  
33 significantly lower compared to larvae produced from wild broodstock ( $8 \pm 3\%$  and  $21 \pm 2\%$ ,  
34 respectively) near the end of a 10-day period with no food (phytoplankton). All larval cohorts had  
35 arrested growth during the starvation period and took at least two days to recover once food was  
36 reintroduced before resuming growth. Phenotypic differences between the wild and aquaculture  
37 lines suggest potential differences in the capacity to sustain extended food limitation, but this work  
38 requires replication with multiple selection lines and wild populations to make more general  
39 inferences about domestication selection. With this contribution we explore the potential for  
40 domestication selection in bivalves, discuss the physiological and fitness implications of reduced  
41 starvation tolerance, and aim to inspire further research on the topic.

42 **Keywords:** *Crassostrea virginica*, growth rate, respiration, domestication, selective breeding,  
43 oyster, physiology

## 44 **Introduction**

45 For many regions, climate change predictions suggest rising temperatures and dramatic  
46 variations in precipitation [1] that will stress estuarine and coastal populations through rapid  
47 changes in salinity and the spread and proliferation of disease [2,3]. Given the urgency of  
48 conservation needs to maintain population viability under rapid environmental change, the  
49 prospects for “assisted evolution” using selective breeding or developmental manipulations have  
50 increasingly been discussed and investigated [4]. One concern with selective breeding as part of a  
51 population management strategy is that captivity itself can impose unintended artificial selection  
52 [5,6]. Evolutionary responses to this “domestication selection” can be swift in captive populations  
53 [5,7,8] with the potential for reduced fitness in the wild relative to wild born individuals [9]. The  
54 propensity for rapid domestication selection is tied to life history because selection can be  
55 especially strong on cohorts of high fecundity organisms with high early mortality (type III  
56 survivorship curve). When domestication selection is strong within a single propagation cohort,  
57 such as was demonstrated for salmonids [5], then its effects can potentially impact the success of  
58 hatchery-based population supplementation. These considerations are of particular relevance to  
59 marine bivalves because (1) they express extreme versions of this life history, (2) native bivalve  
60 populations are depleted in some areas and receiving hatchery-based population supplementation  
61 [10], and (3) selectively bred strains intended for commercial aquaculture have been promoted and  
62 used for population supplementation, for example in an attempt to mitigate disease mortality [11].  
63 Unfortunately, there is virtually nothing known about the prevalence of domestication selection in

64 aquatic organisms other than salmon, or its fitness consequences in the wild when it occurs. Here,  
65 we hypothesize that larval starvation tolerance is a likely trait subject to domestication selection  
66 and experimentally measure and compare this trait in wild and selected-strain oysters.

67         Natural populations of the eastern oyster *Crassostrea virginica* are only a fraction of  
68 historic densities, and are deemed functionally extinct in some regions of the northeastern U.S.  
69 [12]. The great ecological and economic value of oysters has prompted aggressive population  
70 supplementation (= “restoration”) programs in parts of its native range [13,14] and millions of U.S.  
71 dollars have been spent to revive this once thriving ecosystem engineer [15]. Oyster restoration  
72 approaches often include the hatchery production and planting of spat (juvenile oysters) on shell  
73 to supplement wild recruitment and help jumpstart a population on restored habitat. To reduce  
74 genetic bottlenecks and other genetic changes in culture, the Nature Conservancy recommends  
75 using fresh wild broodstock when producing spat to be deployed for stock enhancement [16]. In  
76 practice, however, selectively-bred eastern oyster strains sometimes get used in population  
77 supplementation for several reasons. In some regions, “wild” broodstock (i.e. non-feral oysters)  
78 are locally sparse and logistically challenging to collect from remnant populations, or available  
79 seed oysters from regional production hatcheries only include domesticated oyster strains intended  
80 for aquaculture production. Also, in some cases selectively bred traits such as disease resistance  
81 are deemed desirable or necessary for successful restoration [11,17,18]. Genetic assignment tests  
82 have generated mixed results documenting spat recruitment from hatchery-produced selected  
83 strain cohort plantings [19,20]. Trade-offs between aquaculture traits and fitness in the wild have  
84 not been evaluated in bivalves to our knowledge.

85         Concerns with using artificially selected lines in restoration include the degree to which  
86 selective breeding inadvertently alters non-target traits, either because they are genetically

87 correlated with the selected trait, or because culture conditions impose selection (domestication  
88 selection). Also, hatchery culture imposes a genetic bottleneck relative to wild cohorts and  
89 domestication selection further strengthens genetic drift, reducing genetic diversity to a degree that  
90 may have a fitness cost under natural conditions [8,10,14]. Evolution of domestication traits is  
91 increasingly under study to understand their rate of change and fitness impacts [5–8,21]. Not  
92 surprisingly, phenotype and performance data for oysters is mostly restricted to commercially  
93 important traits during grow-out from planted spat to adult (market size). Fitness trade-offs across  
94 other parts of the life cycle are relatively unexplored, yet larvae are arguably the most sensitive  
95 life stage [22,23]. Fitness trade-offs are extremely challenging to study in species with a complex  
96 life cycle that includes pelagic larvae [24,25], but it is a reasonable assumption that traits  
97 conferring higher relative fitness in culture, at high population density in a homogeneous  
98 environment, will not increase mean population fitness in the wild.

99         For many marine species, including oysters, tremendous fecundity (e.g. millions of eggs  
100 per female) and high, non-random early mortality suggests that the larval stage may be under  
101 particularly strong selection pressures [23,26,27]. High early mortality (Type-III survivorship)  
102 often characterizes these species in culture as well as in the wild [22,23], potentially involving  
103 strong selection in culture that could result in directional shifts in the mean value of traits favored  
104 by the hatchery environment. In contrast, early mortality due to the expression of a high genetic  
105 load may swamp the signal of directional selection on larval traits, or the two mechanisms could  
106 interact if the segregation of mildly or strongly deleterious mutations contributes to fitness or  
107 growth rate differences among larvae [28–30]. Therefore, understanding the selective forces  
108 underlying early mortality in the hatchery is particularly important in the context of supportive

109 breeding for restoration, but these mechanisms also are relevant for optimization of selective  
110 breeding.

111 Nutrition is the major driver for growth and development during pelagic life stages of  
112 bivalve larvae [31,32]. Natural temporal and spatial variation in food quality and quantity can be  
113 extreme [32], leaving free swimming larvae vulnerable to periods of insufficient food supply [33].  
114 During the hatchery culture of bivalves, environmental conditions are controlled to support the  
115 best growth and survival at a relatively high larval density, including a simple (low diversity) diet  
116 [34]. Because of the high variability of food quality and quantity in the natural environment  
117 compared to *ad libitum* feeding under hatchery culture, metabolic processes may be under different  
118 selection pressures resulting in domestication selection. In a hatchery-based larval culture  
119 experiment in the Pacific oyster, Plough [35] showed that rearing with a 3-species algal diet  
120 significantly increased larval growth and survival, and reduced the expression of genetic load  
121 (measured as genetic inviability) compared to a single species algal diet, highlighting the  
122 importance of food quality specifically and genetic by environment interactions more generally.

123 Oysters produced for the aquaculture industry are often selectively bred for traits that speed  
124 up production, such as fast growth, and that improve survival (e.g. disease resistance; [36].  
125 However, it is unclear whether or not other (unintended) traits are evolving due to genetic  
126 correlations, adaptation to the artificial environment, or heritable epigenetic changes during  
127 hatchery culture. As a first step towards examining the potential effects of domestication selection  
128 in oysters, we performed an experiment comparing the starvation resistance of larvae produced  
129 from wild (no prior hatchery exposure) and artificially selected (over multiple generations of  
130 hatchery propagation) broodstock oysters. The goal of this paper was to measure and compare  
131 starvation tolerance of larvae produced from wild (no previous hatchery propagation) and

132 selectively bred (many generations of hatchery propagation) broodstock as an initial exploration  
133 of possible domestication effects. Feeding environment during early development matters a great  
134 deal for both aquaculture and population supplementation goals, making starvation resistance an  
135 appealing first target among the many traits that could have changed as a result of adaptation to  
136 hatchery conditions. Because oyster larvae have a wide variance in growth rates within families  
137 [30] and hatchery production often includes the culling of slow growing larvae, we also separated  
138 and compared slow and fast early growth larval phenotypes in each line. Separating larvae by  
139 early early growth rate provided the opportunity to compare stress responses of physiologically  
140 distinct portions of each line. We used growth, survival, and respiration (rate of oxygen depletion)  
141 as measures of physiological response to a prolonged (10-day) starvation period between lines and  
142 among cohort growth-fractions.

## 143 **Methods**

### 144 **Broodstock conditioning and spawning**

145 Wild adult oysters were collected from the Choptank River, Maryland in the Chesapeake  
146 Bay and two disease-resistant aquaculture lines (Deby (DBY) and DBY-CROSBreed (XB)) were  
147 obtained from the Virginia Institute of Marine Science, Aquaculture Genetics and Breeding  
148 Technology Center (ABC). All broodstock were held under chilled (20°C) flow-through Choptank  
149 River water at the Horn Point Laboratory Oyster Hatchery in Cambridge, Maryland to promote  
150 gametogenesis, but prevent spontaneous spawning. Local salinity was 9 – 11 ppt during the  
151 conditioning period for Choptank River broodstock. Aquaculture (DBY and XB) oysters were  
152 partially conditioned at the ABC at a salinity of 14 - 16 ppt, before being shipped to Horn Point  
153 Laboratory where they were held under conditions described above for four weeks prior to

154 spawning. The DBY and XB lines have been bred over multiple generations with hatchery  
155 propagation and intensive selection for disease resistance (both MSX and dermo; [36,37]).  
156 Broodstock originated in 1998 from Virginia Institute of Marine Science and the Haskin Shellfish  
157 Research Laboratory for DBY and XB, respectively, but have since been interbred with  
158 Chesapeake Bay oysters and broodstock from Louisiana known to have naturally acquired dermo  
159 resistance [36].

160         On June 26, 2017, oysters were spawned by raising the water temperature from 20°C to  
161 30°C in individual containers with flow-through seawater at a salinity of 9.9 ppt. When  
162 temperature did not induce spawning, heat-killed sperm was added to stimulate spawning. As  
163 individuals began to release gametes, the water flow was stopped for that individual, time was  
164 noted, and sex determined by assessing the released gametes of each individual microscopically.  
165 Oysters were allowed to finish spawning in their individual container to collect and isolate gametes  
166 for each individual. A total of six pair-cross fertilizations were completed between two females  
167 and three males for each strain type (wild and aquaculture) within one hour of the start of spawning  
168 to assure quality of gametes. The DBY and XB selection lines are maintained with methods that  
169 limit inbreeding [36], but to eliminate any potential for inbreeding effects here, our experimental  
170 aquaculture cohort was created with males from the DBY line and females from the XB line  
171 (hereafter referred to as AQF1).

172         Approximately one-hour post fertilization, developing embryos were enumerated  
173 microscopically for each pair cross and the number of embryos from each pair were equalized to  
174 give each parent pair equal opportunity to contribute to the cohort. For each line, the pair-cross  
175 embryos were pooled, then split in half and reared in duplicate 200-L tanks at a density of 30 larvae  
176 mL<sup>-1</sup> for seven-days using 0.5 µm filtered Choptank River water at  $9.7 \pm 0.1$  ppt and 27°C. Larvae



177 were fed a diet of 50:50 *Isochrysis galbana* and *Chaetoceros calcitrans* beginning at 10,000 cells  
178 mL<sup>-1</sup> on day one and was increased each day by 10,000 cells mL<sup>-1</sup>. Water changes were completed  
179 on day three using a 25 µm sieve to assure no larvae were lost and re-stocked at a density of 15  
180 larvae mL<sup>-1</sup> by random size culling. Water changes were completed every other day thereafter with  
181 no culling until day seven. All water was pumped from the Choptank River through a sand  
182 filtration system down to 2 µm followed by successive string and cartridge filtration to 0.5 µm.

### 183 **Total organic carbon (TOC) analysis**

184 To gain a better understanding of the potential sources of dissolved organic matter (DOM)  
185 that may be available as a food resource to larvae during the starvation period, water samples were  
186 collected directly from the Choptank River, from the 0.5 µm river water filter system used to fill  
187 tanks, from the 0.5 µm filtered water with additional carbon filtration, and from experimental  
188 buckets (fed and starved treatments) during a water change (24 hours after filling) 8 days into the  
189 starvation period. Water samples were collected in duplicate and filtered through a 0.2 µm glass-  
190 fiber filters and shipped to the University of Maryland Center for Environmental Science,  
191 Chesapeake Biological Laboratory for total organic Carbon (TOC) and total dissolved Nitrogen  
192 (TDN) quantification.

### 193 **Starvation challenge**

194 At age 7 days old (July 3, 2017), larvae from each line were separated into fast and slow  
195 early growth cohorts by size selecting on an 85 µm sieve. Under normal hatchery rearing, some  
196 culling of small larvae (slow growers) is likely to occur inadvertently by age 7 days as a result of  
197 increasing sieve size to remove dead shell during water changes. All larvae that were caught on  
198 the 85 µm sieve were deemed fast growers and all larvae that went through the sieve, slow growers.

199 This allowed for an approximately equal split in numbers between the fast and slow early-growth  
200 fractions for each cohort, although there was overlap in the resulting size distributions (Fig 1). The  
201 slow early-growth group includes larvae that would typically be culled during normal hatchery  
202 practice.

203 **Fig 1.** Length distributions of larvae at the start of the starvation experiment ( $T = 0$ ; Age = 7 days).  
204 Pink bars represent the fast-growing larvae and blue bars represent slow growing larvae for each  
205 line (wild and AQF1). A total of 60 larvae were measured for each cohort (Wild/Fast, Wild/Slow,  
206 AQF1/Fast, AQF1/Slow). The purple region indicates the overlap in size between the two groups  
207 for each line.

208 Larvae were stocked at approximately  $15 \text{ larvae mL}^{-1}$  in 20 L buckets ( $\sim 300,000$  larvae /  
209 bucket) using  $0.5 \mu\text{m}$  filtered Choptank River water at ambient salinity ( $9.4 \pm 0.7$  ppt) and  
210 temperature ( $27.6 \pm 0.4^\circ\text{C}$ ). For each cohort (Wild/Fast, Wild/Slow, AQF1/Fast, AQF1/Slow) two  
211 treatment conditions were maintained; starved and fed with four replicate buckets for each  
212 cohort/treatment (S1 Fig). Fed control buckets were fed according to the Horn Point Oyster  
213 Hatchery protocol with an increase in phytoplankton concentration by  $10,000 \text{ cells mL}^{-1}$  each day  
214 and starting at  $70,000 \text{ cells mL}^{-1}$  on day 1 of the experimental period. A live phytoplankton diet of  
215 50:50 *Isochrysis galbana* and *Chaetoceros calcitrans* was maintained throughout the entire  
216 experiment so as to keep conditions constant between fed controls and recovery of the starved  
217 treatment. Starting on day 7 post-fertilization, all phytoplankton were withheld from the starved  
218 treatment for ten days after which feeding was resumed. The feeding regime re-started as if the  
219 oysters were 8 days old ( $80,000 \text{ cells L}^{-1}$ ) and increased by  $10,000 \text{ cells L}^{-1}$  each day thereafter.  
220 During the experimental period (starvation and recovery), water changes were completed every  
221 1-3 days at which time live survival counts were completed microscopically using volumetric

222 counts and samples were preserved in formalin for length analysis. To obtain concentrated samples  
223 and conduct survival counts, larvae were transferred to 500 mL beakers, mixed well and four  
224 replicate samples from each beaker were counted to improve precision. Pictures of preserved  
225 larvae were taken using a Nikon Eclipse E600 microscope (Nikon® Instruments, Melville, New  
226 York, USA) equipped with an AmScope MU800B digital camera (AmScope® Irving, California,  
227 USA) and analyzed for length measurements in the AmScope software. Shell lengths of 30  
228 individuals were measured per replicate bucket, except in cases where mortality limited the  
229 numbers of measurable shells in later sampling time points. When < 10 larvae were found for  
230 length measurements, these replicates were removed from growth analysis to avoid sampling error.  
231 Changes in tissue coloration and locomotion were noted during live survival counts, but were not  
232 quantitatively measured.

## 233 **Respiration**

234 Respiration rates of larvae were measured using FireStingO<sub>2</sub> fiber-optic oxygen meter  
235 (Pyro Science Co., Aachen, Germany) in 5mL closed respirometry chambers. Measurements were  
236 made for each of three replicate buckets per cohort/treatment on T = 10, 15 and 18 days after  
237 treatment onset (ages 17, 22, 25 days) by transferring 1,000 larvae (volumetric counts) to each vial  
238 (200 larvae mL<sup>-1</sup>). Filtered seawater controls were run simultaneously to account for background  
239 respiration and vials were kept in the dark to inhibit photosynthesis of any autotrophic organisms  
240 present in the culture media (e.g. phytoplankton in the fed treatments). Oxygen depletion was  
241 monitored continuously with measurements recorded every minute. Respiration rates are reported  
242 as the slope of the linear regression giving a rate of oxygen depletion during the period of linear  
243 decline and over a period of one hour, starting approximately 20 minutes after deployment to the  
244 chambers to limit noise just after handling. Rates were normalized by mean shell length to improve

245 comparability over time and between treatments where mean length varied significantly. Due to  
246 high mortality in the starved treatment for the AQF1 line (both fast and slow cohorts), replication  
247 was lacking and therefore respiration rates were not measured.

## 248 **Statistical analysis**

249 A one-way ANOVA was used to test for significant differences in the water chemistry  
250 (TOC and TDN) among water sources. Survival and growth were analyzed by two-way ANOVA  
251 with length or survival being the response variable, cohort (Wild/Slow, Wild/Fast, AQF1Slow,  
252 AQF1/Fast) and day being independent factors to test for differences between lines and growth  
253 cohorts over time. Feeding treatment (starved and fed) was also included as an independent factor  
254 for analysis of the first seven days of the experiment. However, due to differences in  
255 developmental stage, feeding treatments were also analyzed independently to examine differences  
256 among line and growth cohorts. Survival data were arcsine square root transformed to meet the  
257 assumptions of normality. Respiration rate was analyzed by two-way ANOVA using cohort,  
258 feeding treatment, and day as independent factors. When differences were detected, all analyses  
259 were followed by a Tukey's HSD post hoc analysis. Statistical analysis was completed in RStudio  
260 version 3.5.2 and significance reported when  $p \leq 0.05$ .

## 261 **Results**

### 262 **Spawning and initial cohort attributes**

263 Fertilization success was  $\geq 95\%$  for all pair crosses. The number of fertilized embryos  
264 produced from each pair ranged from  $1.4 \times 10^6 - 9.0 \times 10^6$  and averaged  $2.0 \times 10^6$  for

265 AQF1pairs and  $5.4 \times 10^6$  for the wild pairs. A standardized count of  $1.4 \times 10^6$  embryos per pair  
266 cross were pooled within each line to give each pair equal chance to contribute.

267 At the start of the starvation treatment (age 7 days old) fast growing larvae in the AQF1  
268 and wild lines averaged  $103.6 \pm 0.6 \mu\text{m}$  and  $108.8 \pm 1.7 \mu\text{m}$  shell length, and the slow growing  
269 larvae were  $89.4 \pm 1.6 \mu\text{m}$  and  $94.23 \pm 1.8 \mu\text{m}$ , respectively (Fig 1). The coefficient of variation  
270 in size was similar across cohorts (ranging from 8 – 11% among cohorts). Wild/Fast larvae were  
271 significantly larger than Wild/Slow and AQF1/Slow (One-way ANOVA  $F_{3,4} = 14.97$ ;  $p < 0.05 =$   
272  $0.012$ ), however AQF1/Fast had a larger overlap in size with AQF1/Slow and were not statistically  
273 different ( $p = 0.058$ ) from each other. Larvae from duplicate culture tanks were pooled before  
274 counts, and at that time survival (age 3-7 days) was 60% and 67% in AQF1 and wild lines,  
275 respectively.

## 276 **Total organic carbon and dissolved nitrogen**

277 The amount of TOC in the hatchery water was lower than that in the river water in this  
278 experiment, however large amounts of carbon remained in the hatchery filtered water (CFS) for  
279 potential assimilation by larvae (Fig 2A). The addition of the carbon filter significantly reduced  
280 the amount of TOC present in the water ( $F_{6, 11} = 331.11$ ;  $p < 0.001$ ; Post Hoc Tukey's HSD  $p <$   
281  $0.001$ ; Fig 2A). The carbon filter addition contributed to the removal of TDN from the river water,  
282 although the change was subtle. TDN was significantly elevated in the fed treatments compared to  
283 starved treatments and the initial concentrations in both the River water and filtered hatchery water  
284 ( $F_{6, 11} = 14.908$ ;  $p < 0.001$ ; Post Hoc Tukey's HSD  $p < 0.001$ ; Fig 2B).

285 **Fig 2.** Total organic carbon (A) and total dissolved nitrogen (B) in water collected directly from  
286 the Choptank River, the Cartridge Filtration System (CFS) used for experiments, and water from

287 the filtration system with an additional carbon filter (CFS carbon). Additionally, water samples  
288 were collected from fed and starved treatments during water changes for comparison. Samples  
289 from the buckets were taken after approximately 24 hours of larval culture. Asterisks indicated  
290 water samples that are significantly different.

## 291 **Survival**

292 After only 3 days of starvation ( $T = 3$ , age = 10 days), clear distinctions in gut coloration  
293 were seen with dark full guts in the fed controls and only light coloration in the starved larvae (S3  
294 Fig). Starved larvae were still actively swimming and casual observations indicated comparable  
295 activity to that of the fed controls. After 7 days of starvation ( $T = 7$ , age = 14 days), swimming  
296 activity was minimal in the starved treatment and guts showed little coloration (S4 Fig). Many  
297 larvae in the fed controls developed eye spots by age 14 days, a predictor of settlement  
298 competency. By the end of the starvation period ( $T = 10$  days; Age = 17 days) larvae in the starved  
299 AQF1 line primarily consisted of dead shell with very few live larvae found in samples for  
300 measurements (S5 Fig) and developmental differences had increased between the fed control and  
301 the remaining live larvae in the starved treatment. Starved larvae were stunted in the early stages  
302 of developing the umbo, while fed larvae had fully developed umbos and many had advanced to  
303 develop eye spots. Additionally, settlement was observed on the sides of the fed treatment tanks  
304 beginning at age 15 days.

305 In the fed controls, survival was significantly affected by day ( $F_{8, 82} = 7.2417$ ;  $p < 0.05$ ) and  
306 cohort ( $F_{3, 82} = 9.326$ ;  $p < 0.05$ ), but there was no interaction between them. The Wild/Slow cohort  
307 had significantly lower survival than all other cohorts (Tukey's HSD  $p < 0.01$ ) throughout the  
308 experimental period; however, analysis at age 14 days, the last day before setting was evident,

309 showed no significant difference among the four cohorts (Fig 3A). By age 14 days, larvae in all  
310 fed cohorts showed signs of competency (eyesspots and extension of the foot in search of substrate)  
311 and setting was observed on the sides of the buckets in the days following this observation.  
312 Therefore, survival beyond day 14 could not be used to accurately compare cohorts as reduction  
313 in larval numbers was in part due to settlement.

314 **Fig 3.** Survival over time for each cohort. The starvation period lasted from age 7 – 17 days  
315 (indicated by the blue box on the x-axis) at which time ( $T = 10$  days) food was reintroduced and  
316 the recovery period began. Fed controls (top) began setting to the sides of the buckets by 15 days  
317 old ( $T = 8$  days) and thus the plot is truncated. Inset shows closer detail of the survival observed  
318 for starved larvae at the end of the experimental period (Age 19 – 29 days). By age 22 days,  
319 replicates for AQF1/Slow and AQF1/Fast were each pooled due to low survival within each  
320 replicate. Error bars represent standard error.

321 Survival in the starved treatment showed a significant interaction between day and cohort  
322 ( $F_{33, 133} = 2.073$ ;  $p < 0.005$ ). During the first seven days of starvation, survival in the starved  
323 treatments was similar to that of the fed controls, however the Wild/Slow starved had significantly  
324 lower survival than all other cohorts and treatments ( $F_{7, 212} = 6.476$ ;  $p < 0.001$ ; Tukey's HSD  $p <$   
325  $0.05$ ) due to initially high mortality (Fig 3B). Survivorship patterns were otherwise similar between  
326 treatments with high early mortality leveling off from age 11 to 14 days. A second drop in survival  
327 was observed toward the end of the starvation period (age 15-17 days), especially for the  
328 AQF1line. By the end of the starvation period (age 17 days) no statistical difference was observed  
329 between the Wild/Slow and Wild/Fast cohorts with  $19 \pm 5\%$  and  $23 \pm 11\%$  survival, respectively  
330 (Fig 3B). Both AQF1 cohorts showed a large drop in survival from age 15-17 days with  
331 AQF1/Slow and AQF1/Fast cohorts finishing the 10-day starvation period with only  $11 \pm 3\%$  and

332  $4 \pm 3\%$  survival, respectively (Fig 3B). Mortality continued even after food was reintroduced with  
333  $< 10\%$  survival after 4 days of recovery (Age = 22 days) for all starved cohorts (Fig 3B inset).  
334 Graphical trends suggest that the higher survival observed for wild cohorts at the end of starvation  
335 was maintained during the recovery period. However, AQF1 cohorts were each pooled by age 22  
336 days, therefore statistical comparison among lines was not possible due to a lack of replication.  
337 Although overall survival was low in the starved treatments, those that survived were successful  
338 in completing metamorphosis and eye spot development was observed as early as age 22 days, just  
339 four days into the recovery period.

## 340 **Growth**

341 For larvae in the fed controls, shell length was significantly impacted by cohort ( $F_{3, 93} =$   
342  $16.497$ ;  $p < 0.001$ ) and day ( $F_{7, 93} = 250.557$ ;  $p < 0.001$ ) but not their interaction. The significance  
343 of cohort as an effect was largely driven by the significantly larger size observed in the Wild/Fast  
344 larvae compared to all other cohorts at ages 14 – 19 days (Tukeys HSD  $p < 0.001$ ; Fig 4) due to  
345 faster early growth. Signs of settlement competency were evident as early as 14 days post  
346 fertilization, and recently settled oysters were observed on the sides of the buckets from day 15  
347 onward. Thus, after age 14 days, the slope of the growth curves (growth rate) is not interpretable  
348 because of a bias from larger individuals settling out of the larval pool. Nonetheless, a steeper  
349 decline in size for Wild/Fast for the day 17 - 22 interval relative to Wild/Slow, and subsequent  
350 slower increase in size relative to Wild/Slow, indicates that a combination of growth rate and/or  
351 settlement differences led to a convergence of size in the Wild/Slow and Wild/Fast fed cohorts by  
352 day 25.



353 **Fig 4.** Mean shell length over time for each line by cohort grouping in fed controls and starved  
354 treatment. Culture from days 3-7 post fertilization occurred in 200-L larval tanks (prior to feeding)  
355 and size-based experiments in 20-L tanks. Shell lengths for fed controls after age 14 days and  
356 starved treatments after age 22 days should be interpreted with caution because settlement of large  
357 individuals out of the larval pool may have biased the size distribution. Arrows indicate days in  
358 which settlement was clearly observed in each treatment. Age 7 – 17 days represent the period of  
359 starvation, indicated by the blue box on the x-axis. Error bars represent standard error. Due to low  
360 survival in the AQF1 cohorts, length measurements were not possible after age 14 and 22 days for  
361 fast and slow growers, respectively. Additionally, from age 17 to 22 days in the AQF1/Slow cohort  
362 only one replicate of length measurements was possible.

363         Patterns in shell length differed significantly between the fed controls and starved  
364 treatments with significant treatment by day ( $F_{1, 71} = 254.39$ ;  $p < 0.001 = 2.2 \times 10^{-16}$ ) and cohort by  
365 day ( $F_{12, 71} = 2.62$ ;  $p < 0.001 = 0.006$ ) interactions during the first seven days of treatment (before  
366 settlement started in fed control; Fig 4). All larvae in the fed treatment continued to show  
367 significant growth over the first seven days, while growth in the starved treatment was stunted for  
368 all cohorts (Fig 4). Within the starved treatments, a significant cohort by day interaction ( $F_{21, 83} =$   
369  $2.32$ ;  $p < 0.001 = 0.004$ ) also was observed across the duration of the experimental period. Shell  
370 length showed no significant increase once food was removed, so fast early-growth cohorts  
371 remained larger than slow early-growth cohorts. The exception was AQF1/Fast, which had a  
372 growth slow down during the same day 10-14 interval when the fed AQF1/Fast slowed growth.  
373 Even after food was reintroduced to the starvation treatment, growth remained stunted for at least  
374 two days (age 17-19 days) before starting to increase (age 19-22 days) and showing the fastest  
375 growth of the experiment between day 22 and 25 (after which settlement started; Fig 4). Once

376 growth resumed during the recovery period, Wild/Fast and Wild/Slow had no significant  
377 difference in shell length (Fig 4). For the AQF1 line, high mortality in the starved treatments  
378 prevented growth comparisons after day 14 when less than 10 larvae were found for measurement  
379 in all replicates except for one replicate in the AQF1/Slow cohort. A one-way ANOVA with wild  
380 larvae endpoint data (age 29 days when both groups are losing larger individuals to settlement)  
381 showed no significant difference in shell length between treatments although the trend was for  
382 starved treatment larvae to have smaller size ( $251.0 \pm 3.4\mu\text{m}$ ) on average compared to fed controls  
383 ( $267.0 \pm 6.2\mu\text{m}$ ).

## 384 **Respiration**

385 Due to low replication, Fast and Slow cohorts for each line were pooled for comparison of  
386 respiration rates between lines. Length-normalized respiration rate was significantly impacted by  
387 day ( $F_{1,38} = 13.8952$ ;  $p < 0.001$ ) and increased with age for both fed control and post-starved larvae  
388 (Fig. 5). Larvae at age 25 days had significantly higher length-normalized respiration rate than  
389 both 17 and 22 days (Tukey's HSD;  $p < 0.05$ ). There was not a significant effect of treatment, but  
390 this may be due in part to low replication ( $N=2$ ) in the starved treatment for measurement at age  
391 17 days. Normalized respiration rates at the end of the 10-day starvation period were low compared  
392 to fed controls (Fig 5), but within 5 days of the reintroduction of food the Wild/Starved larvae had  
393 rates similar to that observed in the fed controls.

394 **Fig 5.** Shell length standardized respiration rates of all cohorts measured at the end of the  
395 starvation exposure ( $T = 10$ ; Age 17 days), and during recovery at 5- and 8-days post  
396 reintroduction of food (Age 22 and 25 days, respectively). The number of replicates per  
397 timepoint for each cohort is indicated above each bar. Error bars represent standard error.

## 398 **Discussion**

399           The distribution of genomic and phenotypic changes during domestication are a  
400 fundamental question related to breeding practice in aquatic species [5–7], with potential fitness  
401 impacts on wild populations if there is interbreeding or deliberate population supplementation with  
402 domesticated strains. As a first step to investigating the potential for domestication selection in the  
403 eastern oyster, we compared starvation tolerance of larvae produced from wild and selectively bred  
404 broodstock. Assuming that selection for this trait is strong in the wild and nonexistent under  
405 culture, we predicted that starvation tolerance would be greater in the larval progeny of wild  
406 oysters relative to larvae from closed selection lines (multiple generations of larval culture with *ad*  
407 *libitum* feeding). This prediction was informed by the considerable molecular transporter  
408 machinery that allows for larval body maintenance via DOM absorption in the absence of algal  
409 food [38]. If this transporter machinery is energetically costly, starvation tolerance could weaken  
410 in closed selection lines as either a response to release from selection, or to selection for faster  
411 growth. Selection for faster growth under *ad libitum* feeding could have selected against  
412 expression of these proteins, lowering starvation tolerance. Alternatively, selection for faster larval  
413 growth could have generated changes in other metabolic traits with DOC transporter functions  
414 maintaining their fitness value due to pleiotropy even under *ad libitum* feeding. These scenarios  
415 suggest that selected strain larvae should grow faster than wild larvae under *ad libitum* algal  
416 feeding, all else being equal and assuming no inbreeding effects. In the absence of growth rate  
417 differences on a live phytoplankton diet, suggesting weak selection on this life history stage in the  
418 history of the selected strain, unequal starvation tolerance would imply correlations with traits  
419 under stronger selection.

420 Control larvae with ad *libitum* phytoplankton showed overall similar mortality and growth  
421 rates across all cohorts. This contradicts predictions that selectively bred aquaculture strains have  
422 greater larval growth rates compared to wild larvae. In fact, the Wild/Fast larvae maintained a  
423 greater mean size throughout the developmental period compared to both AQF1 cohorts. At the  
424 end of the 10-day starvation period (age 15-17 days), wild larvae showed significantly greater  
425 survival than the AQF1 line, consistent with our prediction. Starvation consisted of withholding  
426 the preferred food (phytoplankton), but micronutrients in the form of dissolved organic matter  
427 (DOM) remained available to the larvae in both the fed and starved treatments, and presumably  
428 were utilized to maintain viability. If AQF1 strains lost some of the wild capacity to utilize DOM  
429 to maintain body condition under food limitation, it suggests that there is an energetic cost to the  
430 molecular transport machinery for providing DOM uptake, and release from selection unlimited  
431 provisioning or selection for fast larval growth could lead to selection against those transport  
432 mechanisms if they have few other functions. Testing these more specific mechanistic hypotheses,  
433 and their impact on fitness, will require further study. Given that this is the first test to understand  
434 mechanisms that could be linked to domestication in eastern oysters, that we are aware of, we  
435 discuss caveats and implications for these findings in the context of related literature.

## 436 **DOM as a source of nutrients during starvation**

437 This study focused on a larval trait predicted to affect fitness in the wild and be subject to  
438 inadvertent selection in hatchery culture (or release from selection maintaining tolerance).  
439 Specifically, we compared starvation tolerance in larvae produced from wild parents and larvae  
440 produced from selectively-bred parents. The selectively bred AQF1 line experienced nearly  
441 complete mortality during the last three days of starvation, while both fast and slow wild cohorts  
442 experienced better survival. Analysis of dissolved organic carbon suggests that although

443 particulate food (phytoplankton) was withheld, micronutrients (e.g. DOM) were present during  
444 starvation. Larvae are capable of utilizing natural sources of DOM [38–41] which may have  
445 provided the energy needed to fuel basal metabolism requirements during the “starvation” period.  
446 While DOM alone is not expected to sustain growth and development, it might allow for somatic  
447 maintenance under food limitation [41] and is expected to represent a large potential energy source  
448 for developing larvae under natural conditions [38]. We therefore hypothesize that the ability to  
449 absorb, transport, and assimilate micronutrients may be an important source of differentiation  
450 between the lines tested and represent promising phenotypes to explore as possible mechanistic  
451 changes associated with domestication selection. It is plausible that aquaculture lines can adapt to  
452 the hatchery environment in which food is provided in excess thereby limiting their ability to  
453 utilize DOM during prolonged starvation events as a result of many generations of hatchery  
454 propagation. However, this would require further and more detailed testing to understand the role  
455 of DOM under food limitation.

## 456 **Survival during prolonged starvation**

457         The most dramatic mortality was observed between days 8 and 10 of the starvation (age 15  
458 – 17 days) in the AQF1 line suggesting that a critical point was reached. Blaxter and Hempel [42]  
459 described a point of no return, in which the duration of starvation induces an irreversible  
460 physiological toll, resulting in death even if a proper food source is restored. This is consistent  
461 with the continued mortality we observed during the recovery period. Survival continued to decline  
462 through age 22 days (5 days into the recovery), during which growth also remained stunted,  
463 suggesting that larvae had not yet rebounded physiologically. When starvation begins at the time  
464 of hatch, His and Seaman [43] suggest that the point of no return for *C. gigas* larvae occurs when  
465 maternal reserves are depleted (6-8 days post-fertilization), but Moran and Manahan [44] observed

466 no significant change in mortality rate during a starvation period up to 14 days post fertilization.  
467 In our study, both wild and AQF1 lines had lower tolerance than that reported by Moran and  
468 Manahan [44], perhaps due to the different age of onset for starvation. When starvation occurs  
469 from onset of hatch, larvae can utilize lipid reserves provided by the egg and reduce metabolic  
470 rates allowing for long term survival (up to 14 days) [32,44]. However, when food is removed  
471 after egg lipid reserves are depleted (6-8 days post hatch), as in our study, mortality can be high  
472 even under short periods of starvation (e.g. 4 days) [32].

473 Larval survival and successful recruitment of subsequent generations following plantings  
474 of hatchery produced spat or adult oysters is an essential component to long term restoration  
475 success. If planted oysters from selective breeding programs produce larvae that cannot survive  
476 the gauntlet of stressors in the estuarine environment, then long term restoration success is stymied.  
477 While we acknowledge that a 10-day period of no phytoplankton availability may be unlikely  
478 under natural conditions, patchiness in larval food quantity [33] and nutritional quality [44] are  
479 expected. Under these conditions an ability to withstand and recover from periods with limited  
480 exogenous energy sources is a critical fitness trait. The lower tolerance to starvation in the selected  
481 strain studied here is consistent with this trait being a costly adaptation weakened as a result of  
482 selection for fast growth or, more likely, a trait correlated with commercial traits under direct  
483 selection. Further comparisons with other eastern oyster selected strains are needed to determine  
484 if this larval tolerance difference is a general result of domestication or specific to the tested strains.

## 485 **Physiological recovery**

486 We observed a two to five-day delay in shell growth once food was reintroduced to the  
487 starved treatments. This is in contrast to Moran and Manahan [44] who saw an immediate

488 resumption of physiological rates, including growth, at the onset of delayed feeding of *C. gigas*  
489 larvae. The delay in growth we observed during the recovery period may be due in part to a delay  
490 in recovering normal feeding behavior [43] and the rebuilding of lost tissue mass and energetic  
491 reserves before energy is used for shell growth [46]. We observed reduced respiration rates at the  
492 end of the 10-day starvation period, but within 5 days of the recovery period respiration rate was  
493 similar to that observed in the fed control groups. Shell growth during the first 5 days of recovery  
494 was low suggesting that although there was an observed recovery in respiration, there was likely  
495 a priority given to somatic tissue growth prior to the production of new shell. While not quantified,  
496 larvae from both lines had a visible loss of tissue mass and an inhibition of locomotion during  
497 starvation, suggesting that any active metabolism was only to maintain homeostasis during a  
498 depressed metabolic state. However, even after 10-days without food, respiration rates in both wild  
499 fast and slow cohorts were still measurable, suggesting that they may be utilizing some exogenous  
500 energy source (e.g. DOM; [44]). After eight days of recovery, growth (as measured by mean shell  
501 length) in the starved treatments was similar to that observed in the fed controls and starved larvae  
502 reached final shell lengths similar to that observed in the fed controls during peak settlement  
503 showing a full recovery for those that survived the starvation period.

## 504 **Variation in growth cohorts between lines**

505 Starvation tolerance is a complex trait, so we expected there might be interactions with  
506 growth rate. Given the development of high size variance early in each line (typical of eastern  
507 oysters), we separated each line into fast and slow early-growth cohorts to test for relationships  
508 with starvation tolerance. The only study that previously examined oyster larval growth variance  
509 [30] did not separate and follow individual size fractions. Even though distinct growth fractions  
510 might be better separated later in larval culture, for the purposes of this experiment the separation

511 was quite early, at day 7 postfertilization. If the fractions represent differences that only affect  
512 early larval growth then their subsequent growth trajectories were expected to be parallel and an  
513 interaction with starvation tolerance was less likely. Alternatively, if early growth differences  
514 marked a persistent phenotypic difference then distinct growth rates were expected for slow and  
515 fast fractions of each line. Size distributions in fed treatments are interpretable in terms of growth  
516 rate only until initiation of settlement at age 14 days (biasing the size distribution thereafter). For  
517 the wild larvae in the fed treatment, the initial size separation between fast and slow growth cohorts  
518 was maintained throughout the experimental period, with no difference in growth rate observed.  
519 In the fed AQF1 line, the initial size distinction was maintained up to age 10 days (3 days since  
520 size separation), but converged by age 14 days between the growth cohorts. The reason for this  
521 difference between wild and AQF1 are not known, but both observations are consistent with  
522 growth differences being a function of early larval processes, not an enduring difference in rate.

523 A similar distinction between fast and slow cohorts was maintained in the starved  
524 treatments throughout the starvation period. Interestingly, once food was reintroduced, the  
525 significant difference in length between growth cohorts disappeared for wild larvae. This is in part  
526 due to a slightly faster growth recovery in the Wild/Slow cohort during age 19 to 22 days, during  
527 which CV increased for both wild cohorts suggesting that some larvae rebounded more rapidly  
528 than others (Fig. S2). The convergence of growth trajectories between fast and slow Wild larvae  
529 is suggestive of compensatory growth in the Wild/Slow cohort, however size specific mortality  
530 and/or settlement cannot be ruled out as interval mortality was high during this time (30% and  
531 48% for fast and slow, respectively) and settlement was apparent in both cohorts by age 22 days.

## 532 **Impacts of line history on the experimental design**



533           There are a number of additional factors associated with the design and setup of this  
534 experiment that may have influenced the outcome and are important to consider. Inbreeding  
535 depression in the AQF1 line is an unlikely explanation for their relatively low survival during  
536 starvation because two largely independent selected lines were crossed to produce the AQF1 larvae  
537 for this experiment. In fact, heterosis effects were a potential outcome of this mating strategy [47],  
538 but were not apparent. Differential maternal effects can also impact larval survival and response  
539 to stress given the importance of egg lipids to early larval development [48]. However, all  
540 broodstock were held under local ambient conditions for four weeks prior to spawning in order to  
541 reduce the impact of different environmental conditions on gamete quality. Also, the experimental  
542 treatment was delayed until day seven postfertilization to reduce the potential for differences in  
543 maternal energy reserves to impact larval tolerance to starvation [43]. Broodstock source salinity  
544 is also a potential confounding factor in this experiment. The aquaculture lines were partially  
545 conditioned at a higher salinity (14 – 16 ppt) prior to arriving at Horn Point where all broodstock  
546 were held for four weeks at the experimental salinity (9.5 ppt) prior to spawning. This did not seem  
547 to put the AQF1 line at a developmental disadvantage because growth was similar among the fed  
548 controls and survival of AQF1 larvae was similar or better than the Wild line. Also, the aquaculture  
549 lines used in this experiment have previously performed well under low salinity conditions (9 – 15  
550 ppt) [37]. Salinity during broodstock gonad conditioning are known to have transgenerational  
551 plastic effects on salinity tolerance in the larval offspring [49], so it is possible that the reduced  
552 salinity at the end of the conditioning period could impact larval resistance to stress. Lastly, we  
553 note that because of extensive restoration in the Chesapeake Bay that includes seeding with  
554 hatchery produced spat [13,14], it is conceivable that our wild broodstock oysters could have some  
555 ancestry from hatchery produced restoration oysters. However, oysters produced in this region

556 would have been sourced from the Horn Point Oyster Hatchery where wild broodstock are used  
557 for supportive breeding. Therefore, broodstock collections used here would at most only have one  
558 prior generation of hatchery propagation, compared to many generations in the closed aquaculture  
559 lines.

## 560 **Conclusions**

561 For oysters, lines artificially selected for aquaculture are serving the farming industry,  
562 where lifetime fitness is not a focus, but rather the emphasis is on farm to table production rates in  
563 which yield is largely a function of growth rate and survivorship. However, in the context of using  
564 hatcheries for stock enhancement, planted oysters must not only grow to maturity, but also  
565 successfully reproduce and generate offspring with robust abilities to withstand the many stressors  
566 encountered during the pelagic life stage. At this early stage of selective breeding in eastern  
567 oysters, the unknown phenotypic impacts from domestication selection may be large or small,  
568 depending on the trait. In this initial experiment, we have shown a slightly lower tolerance to  
569 prolonged starvation in the AQF1 line intentionally selected for disease resistance over multiple  
570 generations of hatchery propagation. Replication of this experiment will be necessary using  
571 different aquaculture strains and additional wild oysters to strengthen the inference that reduced  
572 larval starvation tolerance is linked to domestication selection generally. Based on these initial  
573 results, we suspect bioenergetic processes related to micronutrient uptake and utilization may be  
574 promising candidate traits for investigating mechanistic changes as a result of domestication  
575 selection, or are genetically correlated with traits under direct selection. The great successes of  
576 selective breeding to produce shellfish with improved aquaculture yields is likely to result in an  
577 increased reliance on selectively bred lines for oyster farming. With further oyster domestication

578 expected, our work is of importance to understand inadvertent trait evolution as well as the  
579 potential impacts domesticated oysters can have on natural populations.

580

581 Data for this study are available at: to be completed after manuscript is accepted for publication.

582

## 583 **Acknowledgements**

584 We would like to thank the Horn Point Laboratory Oyster Hatchery for technical support during  
585 this work and conditioning of broodstock. Thanks also go out to Katherine Hornick for technical  
586 support during sampling.

587

## 588 **References**

- 589 1. IPCC. Climate Change 2013: the physical science basis. Contribution of working group I  
590 to the fifth assessment report of the intergovernmental panel on climate change. Stocker  
591 TF, Qin D, Plattner G, Tignor KM, Allen SK, Boschung J, et al., editors. Cambridge,  
592 United Kingdom/New York, NY, USA: Cambridge University Press; 2013.
- 593 2. Ford SE, Smolowitz R. Infection dynamics of an oyster parasite in its newly expanded  
594 range. *Mar Biol.* 2007;151: 119–133. doi:10.1007/s00227-006-0454-6
- 595 3. Burge CA, Eakin MC, Friedman CS, Froelich B, Hershberger PK, Hofmann EE, et al.  
596 Climate change influences on marine infectious diseases: Implications for management  
597 and society. *Ann Rev Mar Sci.* 2014;6: 249–277. doi:10.1146/annurev-marine-010213-

598 135029

599 4. van Oppen MJH, Oliver JK, Putnam HM, Gates RD. Building coral reef resilience  
600 through assisted evolution. *Proc Natl Acad Sci USA*. 2015;112: 2307–2313.

601 doi:10.1073/pnas.1422301112

602 5. Araki H, Berejikian BA, Ford MJ, Blouin MS. Fitness of hatchery-reared salmonids in the  
603 wild. *Evol Appl*. 2008;1: 342–355. doi:10.1111/j.1752-4571.2008.00026.x

604 6. Waples RS. Genetic interactions between hatchery and wild salmonids: lessons from the  
605 Pacific Northwest. *Can J Fish Aquat Sci*. 1991;48: 124–133. doi:10.1139/f91-311

606 7. Christie MR, Marine ML, French RA, Blouin MS. Genetic adaptation to captivity can  
607 occur in a single generation. *Proc Natl Acad Sci USA*. 2012;109: 238–242.

608 doi:10.1073/pnas.1111073109

609 8. Araki H, Cooper B, Blouin MS. Genetic effects of captive breeding cause a rapid,  
610 cumulative fitness decline in the wild. *Science* (80- ). 2007;318: 100–103.

611 doi:10.1126/science.1145621

612 9. Lorenzen K, Beveridge MCM, Mangel M. Cultured fish: Integrative biology and  
613 management of domestication and interactions with wild fish. *Biol Rev*. 2012;87: 639–

614 660. doi:10.1111/j.1469-185X.2011.00215.x

615 10. Camara MD, Vadopalas B. Genetic aspects of restoring *Olympia* oysters and other native  
616 bivalves: Balancing the need for action, good intentions, and the risks of making things

617 worse. *J Shellfish Res*. 2009;28: 121–145. doi:Doi 10.2983/035.028.0104

618 11. Allen SK, Hilbish TJ. Genetic considerations for hatchery-based restoration of oyster

- 619 reefs: A summary from the September 21-22, 2000 workshop. 2000.
- 620 12. Beck MW, Brumbaugh RD, Airoidi L, Carranza A, Coen LD, Crawford C, et al. Oyster  
621 reefs at risk and recommendations for conservation, restoration, and management.  
622 *Bioscience*. 2011;61: 107–116. doi:10.1525/bio.2011.61.2.5
- 623 13. Damiano MD, Wilberg MJ. Population dynamics of eastern oysters in the Choptank River  
624 complex, Maryland during 1989 – 2015. *Fish Res. Elsevier*; 2019;212: 196–207.  
625 doi:10.1016/j.fishres.2018.12.023
- 626 14. Hornick KM, Plough LV. Tracking genetic diversity in a large-scale oyster restoration  
627 program: effects of hatchery propagation and initial characterization of diversity on  
628 restored vs. wild reefs. *Heredity*. 2019;123: 92–105. doi:10.1038/s41437-019-0202-6
- 629 15. Hernández AB, Brumbaugh RD, Frederick P, Grizzle R, Luckenbach MW, Peterson CH,  
630 et al. Restoring the eastern oyster: how much progress has been made in 53 years? *Front*  
631 *Ecol Environ*. 2018;16: 463–471. doi:10.1002/fee.1935
- 632 16. Brumbaugh RD, Beck MW, Coen LD, Craig L, Hicks P. A practitioners guide to the  
633 design & monitoring of shellfish restoration projects: An ecosystems services approach.  
634 Arlington, VA; 2006.
- 635 17. Mann R, Powell EN. Why oyster restoration goals in the Chesapeake Bay are not and  
636 probably cannot be achieved. *J Shellfish Res*. 2007;26: 905–917.
- 637 18. Miller LS, La Peyre J, La Peyre M. Suitability of oyster restoration sites along the  
638 Louisiana coast: examining site x stock interaction. *J Shellfish Res*. 2017;36: 341–351.  
639 doi:10.2983/35.036.0206

- 640 19. Hare MP, Allen SK, Bloomer P, Camara MD, Carnegie RB, Murfree J, et al. A genetic  
641 test for recruitment enhancement in Chesapeake Bay oysters, *Crassostrea virginica*, after  
642 population supplementation with a disease tolerant strain. *Conserv Genet.* 2006;7: 717–  
643 734. doi:10.1007/s10592-005-9108-3
- 644 20. Carlsson J, Carnegie RB, Cordes JF, Hare MP, Leggett AT, Reece KS, et al. Evaluating  
645 recruitment contribution of a selectively bred aquaculture line of the oyster, *Crassostrea*  
646 *virginica* used in restoration efforts. *J Shellfish Res.* 2008;27: 1117–1124.
- 647 21. Skaala Ø, Besnier F, Borgstrøm R, Barlaup B, Sørvik AG, Normann E, et al. An extensive  
648 common-garden study with domesticated and wild Atlantic salmon in nature reveals  
649 impact on smolt production and shifts in fitness traits. *Evol Appl.* 2019; 1–16.  
650 doi:10.1111/eva.12777
- 651 22. Kennedy VS. Biology of Larvae and Spat. In: Kennedy VS, Newell RI, Eble AF, editors.  
652 *The Eastern Oyster: Crassostrea virginica*. College Park, Maryland: Maryland Sea Grant;  
653 1996. pp. 371–421.
- 654 23. Plough LV, Shin G, Hedgecock D. Genetic inviability is a major driver of type-III  
655 survivorship in experimental families of a highly fecund marine bivalve. *Mol Ecol.*  
656 2016;25: 895–910. doi:10.1111/mec.13524
- 657 24. Crean AJ, Monro K, Marshall DJ. Fitness consequences of larval traits persist across the  
658 metamorphic boundary. *Evolution.* 2011;65: 3079–3089. doi:10.5061/dryad.574r7
- 659 25. Emlet RB, Sadro SS. Linking stages of life history: How larval quality translates into  
660 juvenile performance for an intertidal barnacle (*Balanus glandula*). *Integr Comp Biol.*  
661 2006;46: 334–346. doi:10.1093/icb/icj023

- 662 26. Bitter MC, Kapsenberg L, Gattuso J-P, Pfister CA. Cryptic genetic variation underpins  
663 rapid adaptation to ocean acidification. *bioRxiv*. 2019; doi:<https://doi.org/10.1101/700526>
- 664 27. Plough LV. Genetic load in marine animals: a review. *Curr Zool*. 2016;62: 567–579.  
665 doi:[10.1093/cz/zow096](https://doi.org/10.1093/cz/zow096)
- 666 28. Launey S, Hedgecock D. High genetic load in the pacific oyster *Crassostrea gigas*.  
667 *Genetics*. 2001;159: 255–265.
- 668 29. Plough LV, Hedgecock D. Quantitative trait locus analysis of stage-specific inbreeding  
669 depression in the Pacific Oyster *Crassostrea gigas*. *Genetics*. 2011;189: 1473–1486.  
670 doi:[10.1534/genetics.111.131854](https://doi.org/10.1534/genetics.111.131854)
- 671 30. Taris N, Batista FM, Boudry P. Evidence of response to unintentional selection for faster  
672 development and inbreeding depression in *Crassostrea gigas* larvae. *Aquaculture*.  
673 2007;272: 69–79. doi:[10.1016/j.aquaculture.2007.08.010](https://doi.org/10.1016/j.aquaculture.2007.08.010)
- 674 31. Pan T-CF, Applebaum SL, Manahan DT. Genetically determined variation in  
675 developmental physiology of bivalve larvae (*Crassostrea gigas*). *Physiol Biochem Zool*.  
676 2015;88: 128–136. doi:[10.1086/679656](https://doi.org/10.1086/679656)
- 677 32. Kheder RB, Quéré C, Moal J, Robert R. Effect of nutrition on *Crassostrea gigas* larval  
678 development and the evolution of physiological indices. Part A: Quantitative and  
679 qualitative diet effects. *Aquaculture*. 2010;305: 165–173.  
680 doi:[10.1016/j.aquaculture.2010.04.022](https://doi.org/10.1016/j.aquaculture.2010.04.022)
- 681 33. Olson RR, Olson MH. Food limitation of planktotrophic marine invertebrate larvae: Does  
682 it control recruitment success? *Annu Rev Ecol Syst*. 1989;20: 225–247.

- 683 34. Helm MM, Bourne N. Hatchery culture of bivalves: A practical manual. FAO Fisheries  
684 Technical Paper 471. Rome: Food and Agriculture Organization of the United Nations;  
685 2004.
- 686 35. Plough LV. Environmental stress increases selection against and dominance of deleterious  
687 mutations in inbred families of the Pacific oyster *Crassostrea gigas*. Mol Ecol. 2012;21:  
688 3974–3987. doi:10.1111/j.1365-294X.2012.05688.x
- 689 36. Aquaculture Genetics and Breeding Technology Center. The Aquaculture Genetics and  
690 Breeding Technology’s Oyster Breeding Program. Gloucester Point, VA; 2009.
- 691 37. Frank-Lawale A, Allen SK, Dégremont L. Breeding and domestication of eastern oyster  
692 (*Crassostrea virginica*) lines for culture in the mid-Atlantic, USA: Line development and  
693 mass selection for disease resistance. J Shellfish Res. 2014;33: 153–165.  
694 doi:10.2983/035.033.0115
- 695 38. Manahan DT, Crisp DJ. The role of dissolved organic material in the nutrition of pelagic  
696 larvae: amino acid uptake by bivalve veligers. Am Zool. 1982;22: 635–646.
- 697 39. Baldwin BS, Newell RIE. Omnivorous feeding by planktotrophic larvae of the eastern  
698 oyster *Crassostrea virginica*. Mar Ecol Prog Ser. 1991;78: 285–301.
- 699 40. Manahan DT. The uptake and metabolism of dissolved amino acids by bivalve larvae.  
700 Biol Bull. 1983;164: 236–250.
- 701 41. Widdows J. Physiological ecology of mussel larvae. Aquaculture. 1991;94: 147–163.
- 702 42. Blaxter J, Hempel G. The influence of egg size on herring larvae (*Clupea harengus* L.).  
703 ICES J Mar Sci. 1963;28: 211–240.



- 704 43. His E, Seaman MNL. Effects of temporary starvation on the survival, and on subsequent  
705 feeding and growth, of oyster (*Crassostrea gigas*) larvae. Mar Biol. 1992;114: 277–279.  
706 doi:10.1007/BF00349530
- 707 44. Moran AL, Manahan DT. Physiological recovery from prolonged “starvation” in larvae of  
708 the Pacific oyster *Crassostrea gigas*. J Exp Mar Bio Ecol. 2004;306: 17–36.  
709 doi:10.1016/j.jembe.2003.12.021
- 710 45. Vanderploeg HA, Liebig JR, Gluck AA. Evaluation of different phytoplankton for  
711 supporting development of zebra mussel larvae (*Dreissena polymorpha*): The importance  
712 of size and polyunsaturated fatty acid content. J Gt Laje Resour. 1996;22: 36–45.
- 713 46. Kooijman SALM. Dynamic Energy Budget Theory for Metabolic Organization. Third.  
714 Cambridge: Cambridge University Press; 2010.
- 715 47. Hedgecock D, Mcgoldrick DJ, Manahan DT, Vavrab J, Appelmans N, Bayne BL.  
716 Quantitative and molecular genetic analyses of heterosis in bivalve molluscs. J Exp Mar  
717 Bio Ecol. 1996;203: 49–59.
- 718 48. Bayne B. Some effects of stress in the adult on the larval development of *Mytilus edulis*.  
719 Nature. 1972;237: 459.
- 720 49. Davis HC. Survival and growth of clam and oyster larvae at different salinities. Biol Bull.  
721 1958;114: 296–307.
- 722
- 723
- 724

## 725 **Supporting information**

726 **S1 Fig.** Schematic showing the experimental design.

727 **S2 Fig.** Box plots showing length distributions over time for each treatment cohort. After age 14  
728 days, the starved aquaculture growth fractions have very few measurements and means may be  
729 skewed due to the high mortality rates.

730 **S3 Fig.** Micrographs of 10-day old larvae in each treatment after three days of starvation.

731 **S4 Fig.** Micrographs of 14-day old larvae in each treatment after seven days of starvation.

732 **S5 Fig.** Micrographs of 17-day old larvae in each treatment after ten days of starvation.

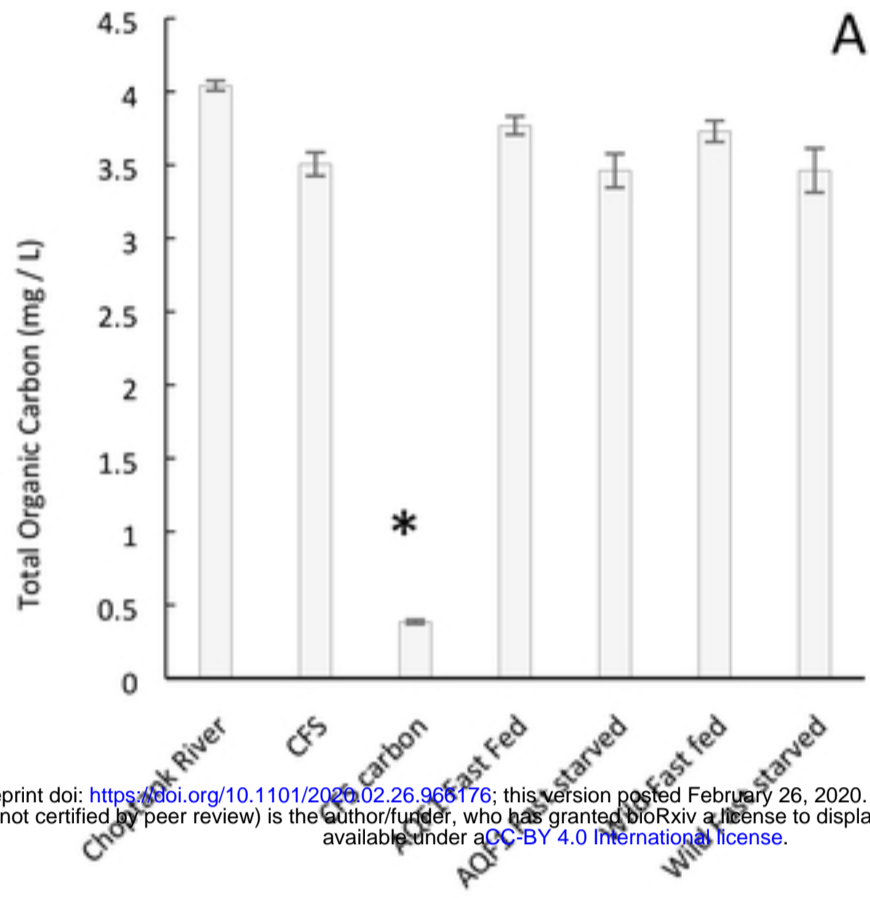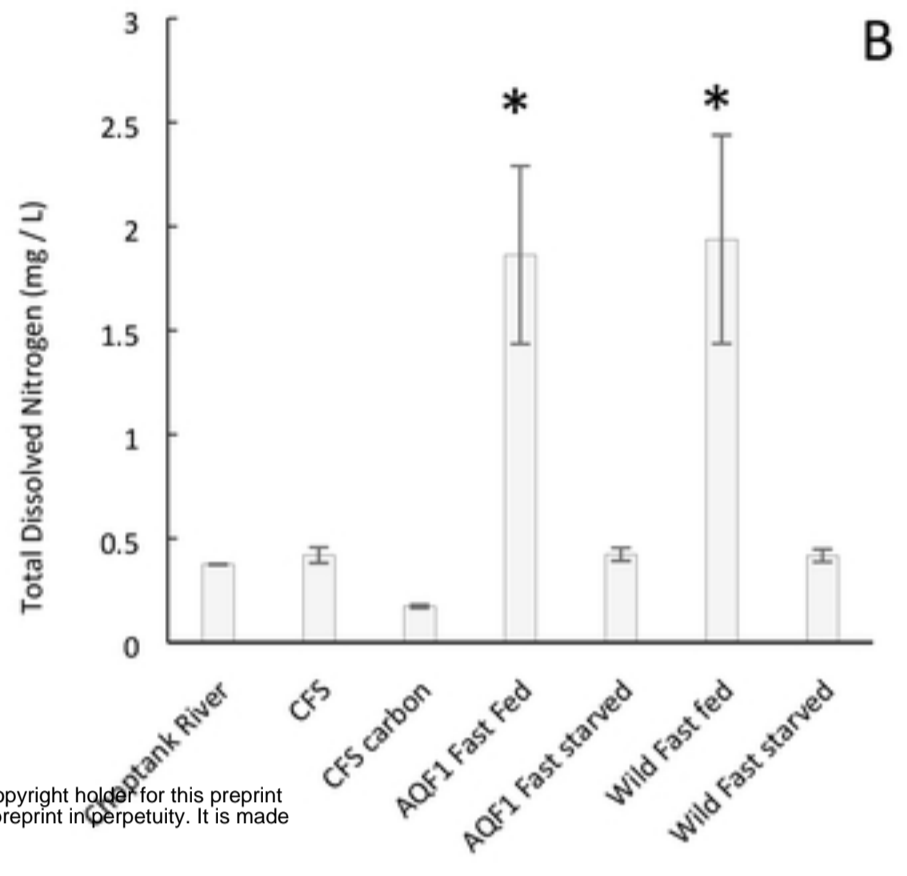

bioRxiv preprint doi: <https://doi.org/10.1101/2020.02.26.968176>; this version posted February 26, 2020. The copyright holder for this preprint (which was not certified by peer review) is the author/funder, who has granted bioRxiv a license to display the preprint in perpetuity. It is made available under aCC-BY 4.0 International license.

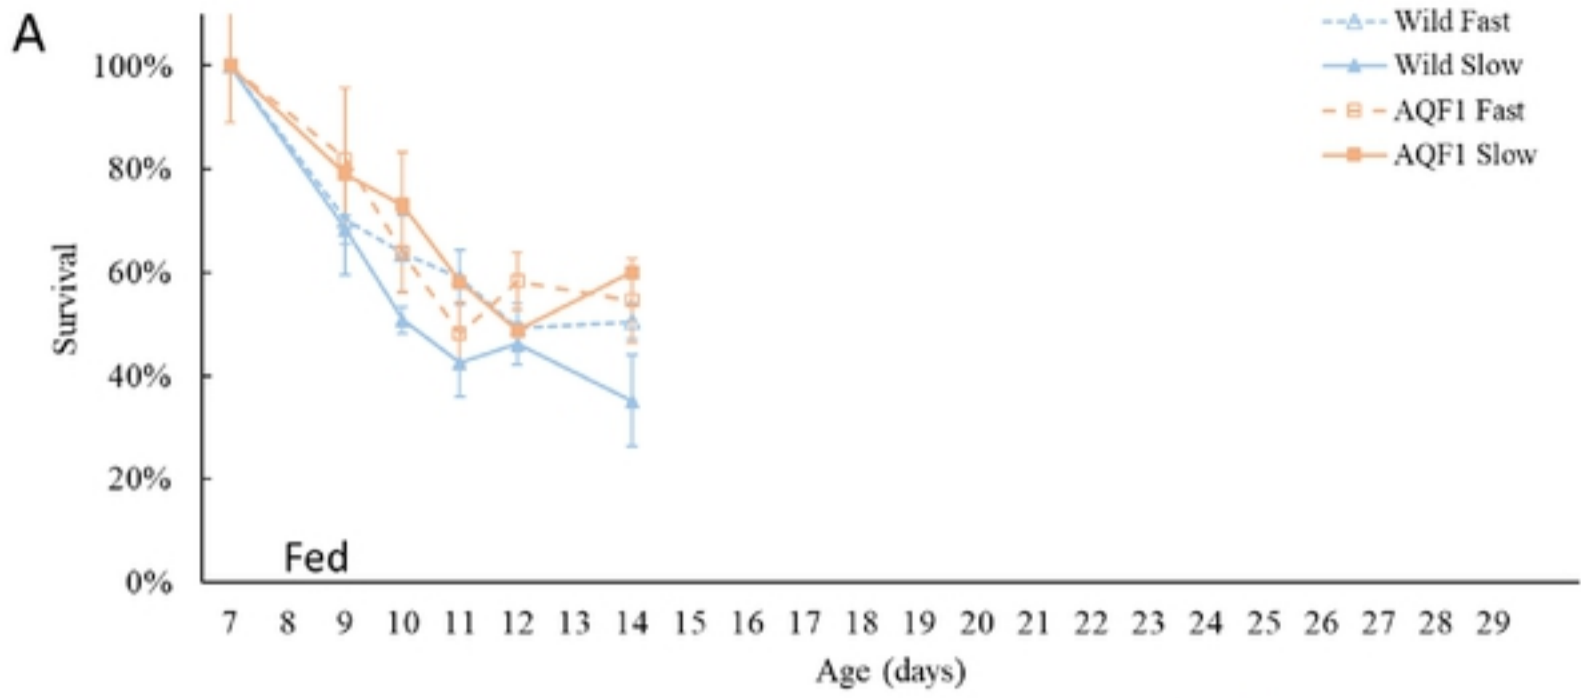

bioRxiv preprint doi: <https://doi.org/10.1101/2020.02.26.966176>; this version posted February 26, 2020. The copyright holder for this preprint (which was not certified by peer review) is the author/funder, who has granted bioRxiv a license to display the preprint in perpetuity. It is made available under aCC-BY 4.0 International license.

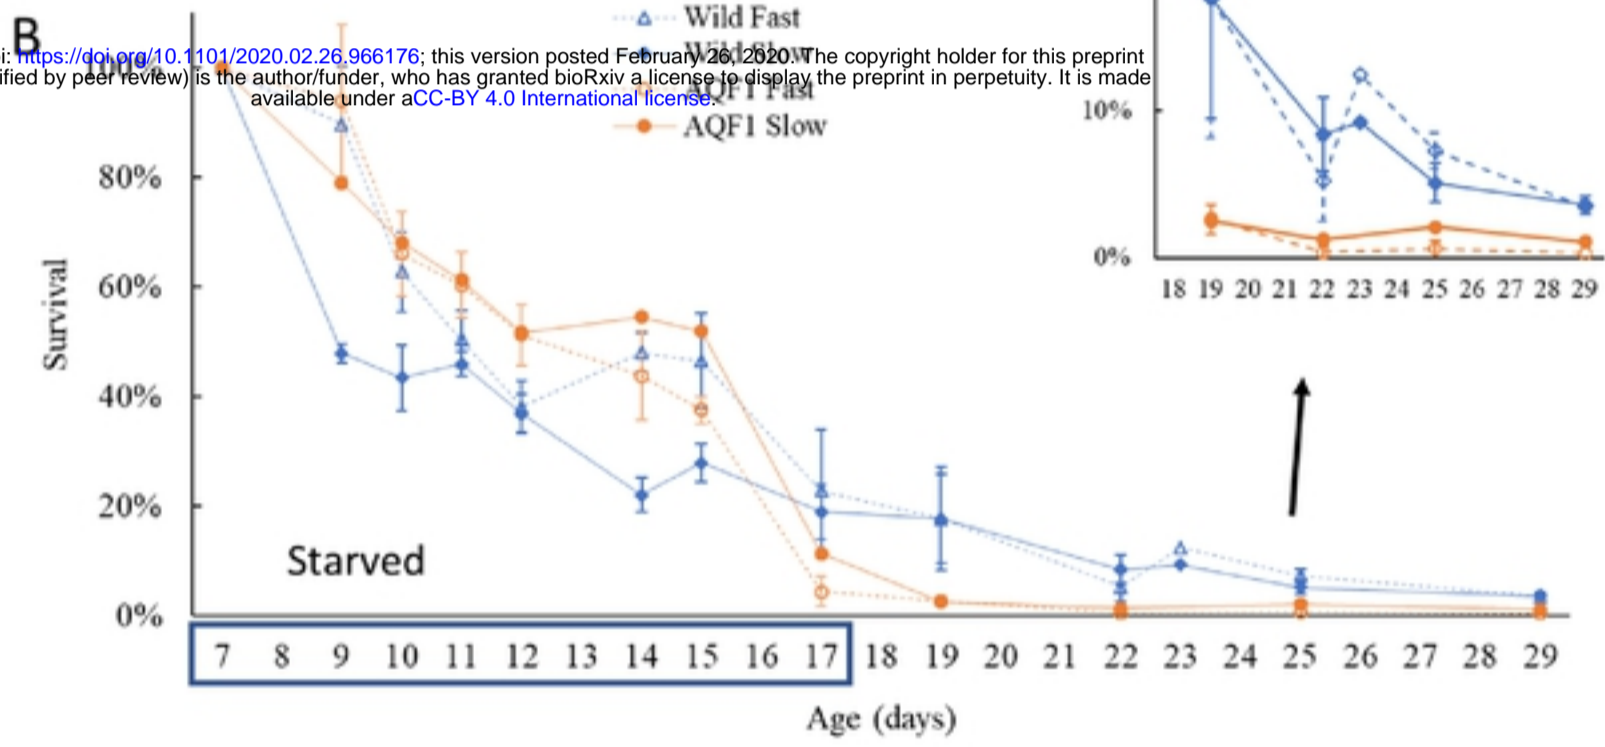

Fig 3

bioRxiv preprint doi: <https://doi.org/10.1101/2020.02.26.966176>; this version posted February 26, 2020. The copyright holder for this preprint (which was not certified by peer review) is the author/funder, who has granted bioRxiv a license to display the preprint in perpetuity. It is made available under aCC-BY 4.0 International license.

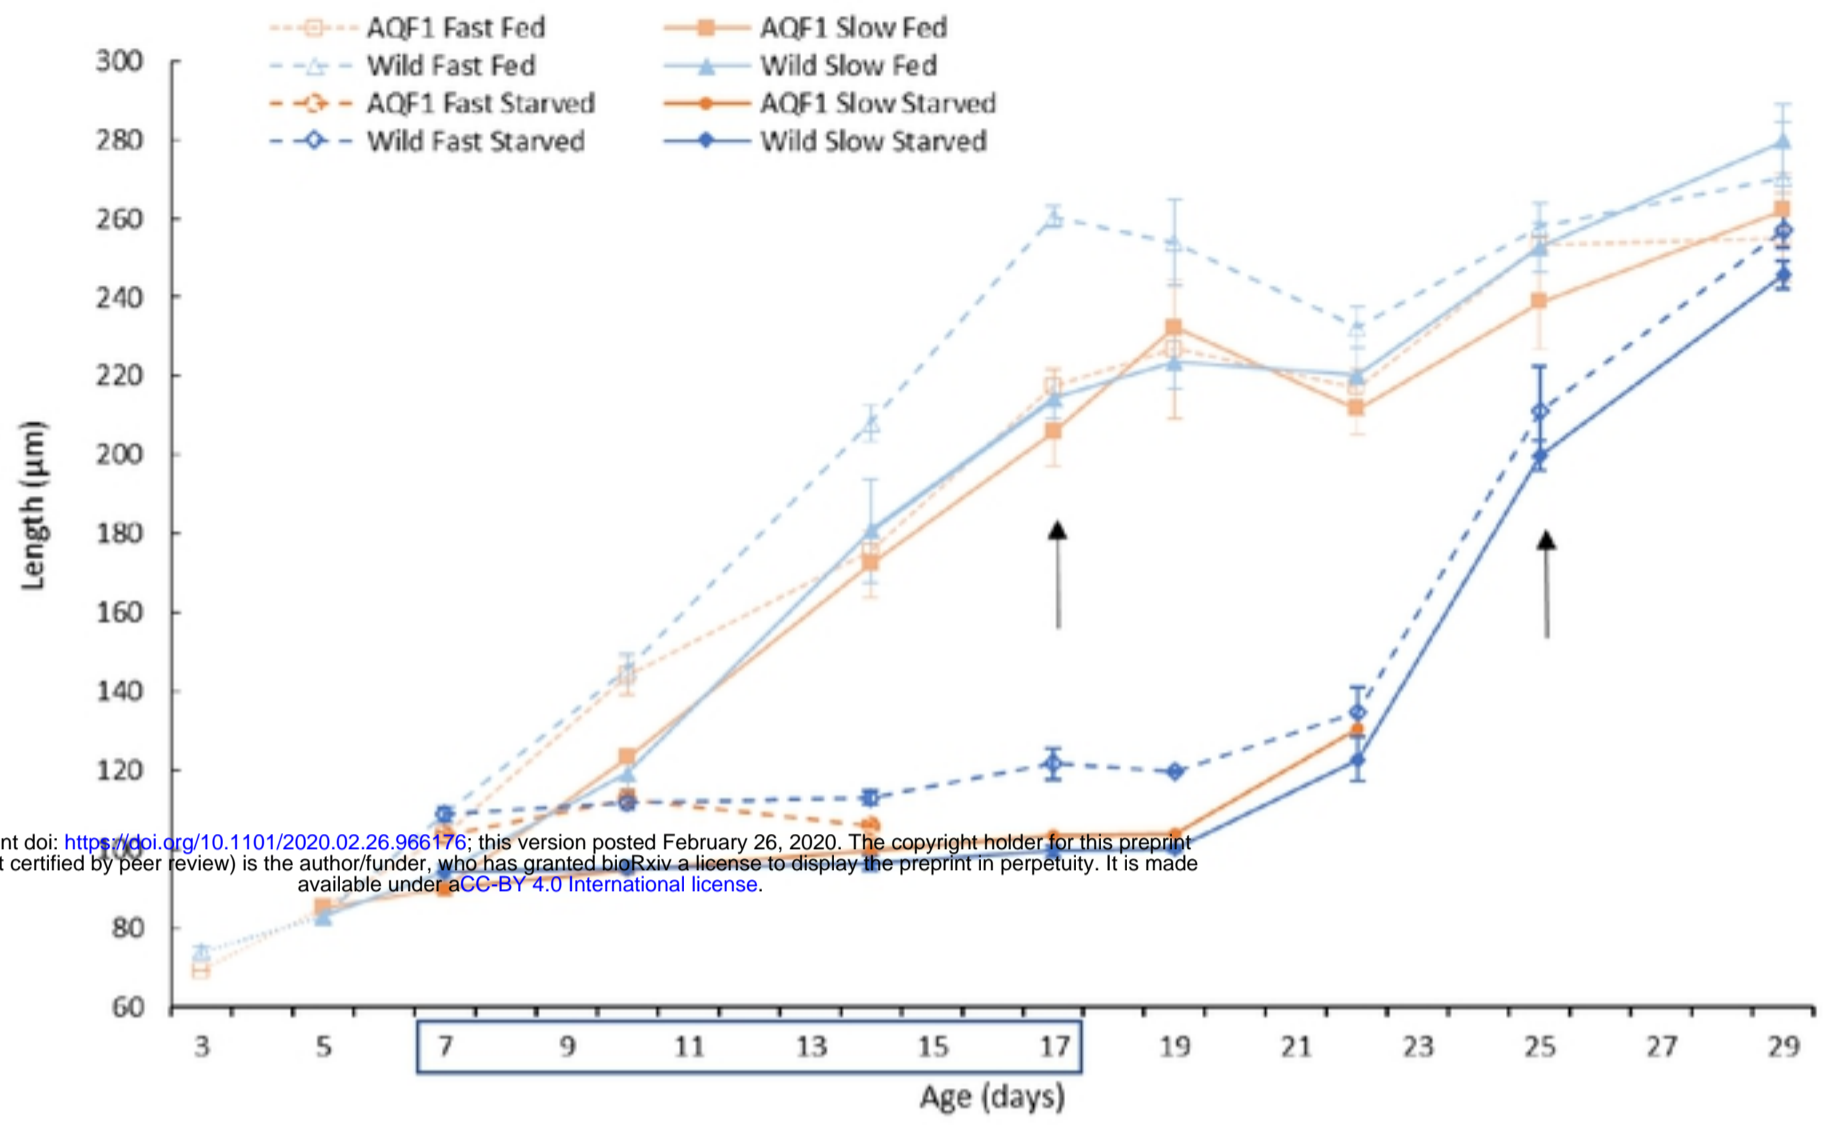

Fig 4

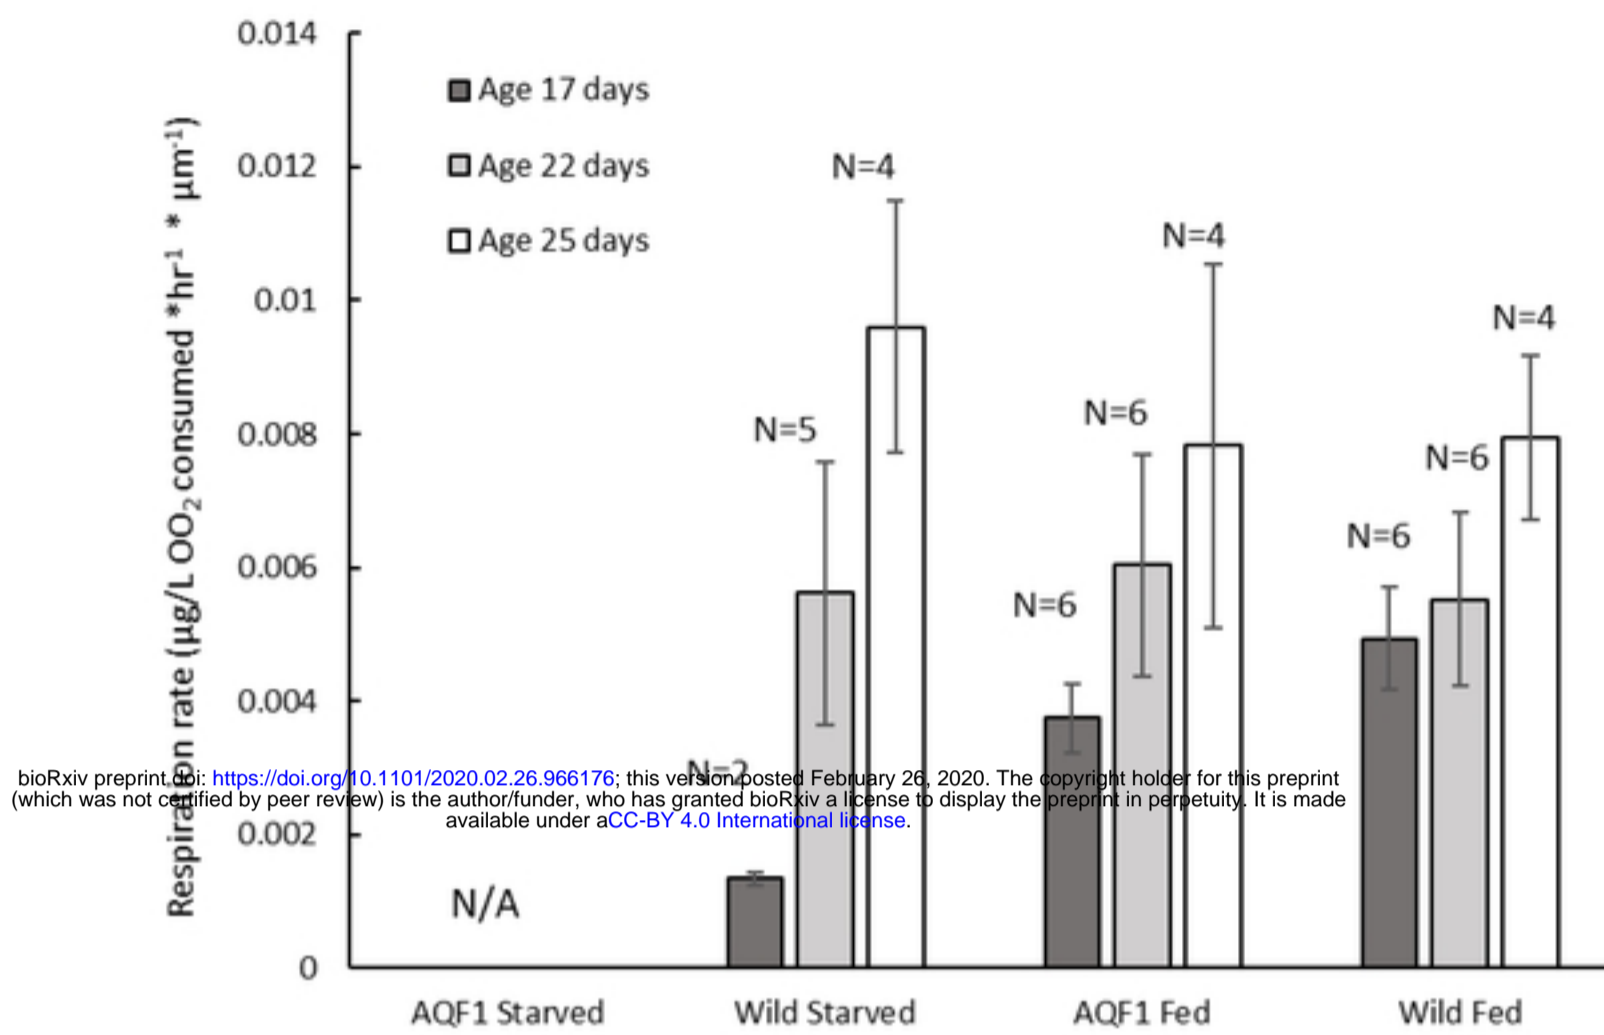

Fig 5

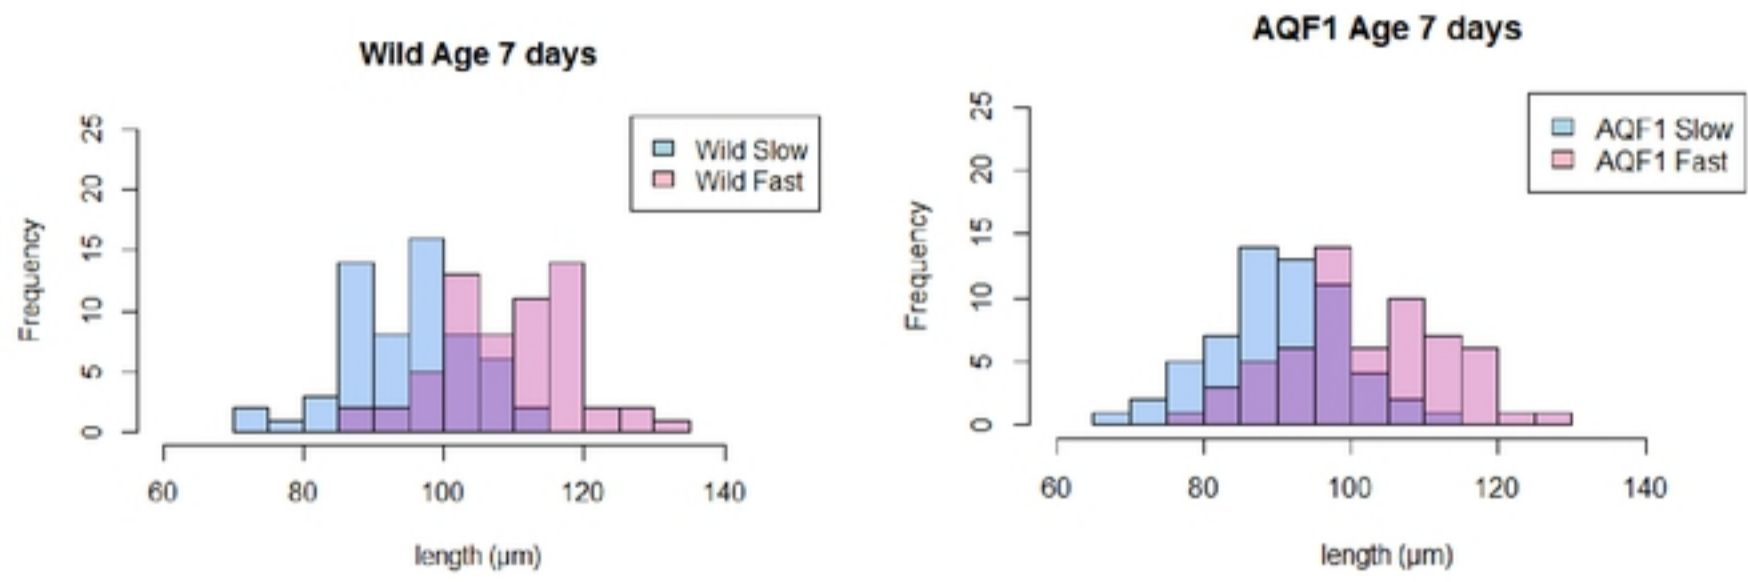

bioRxiv preprint doi: <https://doi.org/10.1101/2020.02.26.966176>; this version posted February 26, 2020. The copyright holder for this preprint (which was not certified by peer review) is the author/funder, who has granted bioRxiv a license to display the preprint in perpetuity. It is made available under aCC-BY 4.0 International license.
